# Supplementary material
Source: publisher figshare collection journal article supplement (https://sage.figshare.com/ndownloader/files/16986761)
Supplement: Supplementary file 1 [file 16986761]

## Sheet: List of Journals
ONLINE APPENDIX: LIST OF JOURNALS
General Management		Accounting
Academy of Management Annals		Accounting, Organizations and Society
Academy of Management Journal		Contemporary Accounting Research
Academy of Management Review		European Accounting Review
Administrative Science Quarterly		Journal of Accounting and Economics
American Economic Review		Journal of Accounting Research
Econometrica		Management Accounting Research
Experimental Economics		Review of Accounting Studies
Journal of Economics & Management Strategy		The Accounting Review
Journal of Industrial Economics
Journal of Management		Finance
Journal of Management Studies		Journal of Banking & Finance
Journal of Political Economy		Journal of Economic Dynamics & Control
Management Science		Journal of Financial and Quantitative Analysis
Science		Journal of Financial Economics
Strategic Management Journal		Journal of Financial Intermediation
The RAND Journal of Economics		Journal of Money, Credit and Banking
		Review of Derivatives Research
Organization and HR		Review of Finance
Journal of Applied Psychology		The Journal of Finance
Journal of Economic Behavior and Organization		The Review of Financial Studies
Journal of International Business Studies
Journal of Labor Economics		Marketing
Journal of Organizational Behavior		International Journal of Research in Marketing
Journal of Public Administration Research and Theory		Journal of Consumer Psychology
Leadership Quarterly		Journal of Consumer Research
Organization Science		Journal of Marketing
Organizational Behavior and Human Decision Processes		Journal of Marketing Research
Organizational Research Methods		Journal of Retailing
Personnel Psychology		Journal of Service Research
The Journal of Strategic Information Systems		Journal of the Academy of Marketing Science
		Marketing Science
Innovation and Entrepreneurship
Entrepreneurship: Theory and Practice
Journal of Business Venturing
Journal of Product Innovation Management
Research Policy
Strategic Entrepreneurship Journal

## Sheet: Coding Table 1
ONLINE APPENDIX: CLASSIFICATION OF LITERATURE (1)
General information				Perspective				Context							Attributes of coverage
Authors	Year	Journal	x	Institutional	Economic	Social-psychological	x	Strategy	Finance	Governance	Crisis	Aggregate	Detail	x	Volume	Tone	Topic	Timing	Language characteristics	x
Ahern & Sosyura	2014	J. of Finance			X	X		X					M&A		X	X		X
Ahern & Sosyura	2015	Rev. of Fin. Stud.			X	X		X					M&A		X		X		X
Ahluwalia, Burnkrant, & Unnava	2000	J. of Mkt. Res.			X	X		X					Product evaluation			X
Bansal & Clelland	2004	AMJ		X						X			Environmental performance			X
Barber & Odean	2008	Rev. of Fin. Stud.			X	X			X				Investor composition		X
Bednar	2012	AMJ		X	X					X			Board & CEO governance		X	X
Bednar, Boivie, & Prince	2013	Org. Science		X	X			X					Strategic change		X	X
Bednar, Love, & Kraatz	2015	AMJ		X		X					X		Poison pill adoption		X
Berger, Sorensen, & Rasmussen	2010	Mkt. Science				X		X					Product evaluation			X
Bitektine	2011	AMR		X								X	Media Legitimacy		X	X
Bowen, Call, & Rajgopal	2010	The Acc. Rev.			X						X		Whistleblowing allegations		X
Briscoe & Murphy	2012	ASQ		X							X		Curtailment of retiree health benefits		X
Bushee & Miller	2012	The Acc. Rev.				X			X				IR by small firms		X
Bushee, Core, Guay, & Hamm	2010	J. of Acc. Res.			X				X				Earnings announcements		X		X
Bushman, Williams, & Wittenberg-Moerman	2017	J. of Acc. Res.			X				X				Syndicated loans			X
Cahan, Chen, Chen, & Nguyen	2015	J. of B&F				X				X			CSR activities		X	X
Carter	2006	J. of M. Studies		X								X			X	X
Chatterjee & Hambrick	2011	ASQ				X		X					Large investments and M&A		X	X	X
Chen, Liu, & Zhang	2012	J. of Marketing			X			X					Product evaluation		X	X		X
Core, Guay, & Larker	2008	J. of Fin. Econ.			X	X				X			CEO pay		X	X
Dai, Parwada, & Zhang	2015	J. of Acc. Res.			X				X				Trading by firm insiders		X
Deephouse	2000	J. of Management		X								X				X
Deephouse & Carter	2005	J. of M. Studies		X								X				X
Desai	2011	AMJ		X							X		Accidents		X	X
Desai	2014	J. of Management		X		X					X		Accidents		X	X
Dixon-Fowler, Ellstrand, & Johnson	2013	Str. Mgmt. J		X		X				X			Appointment of female CEOs		X		X
Dougal, Engelberg, Garcia, & Parsons	2012	Rev. of Fin. Stud.				X			X				Financial news			X
Drake, Guest, & Twedt	2014	The Acc. Rev.			X				X				Earnings announcements		X		X
Drake, Roulstone, & Thornock	2012	J. of Acc. Res.			X				X				Earnings announcements		X
Durand & Vergne	2015	Str. Mgmt. J		X							X		Membership in stigmatized industry		X		X
Dyck, Morse, & Zingales	2010	J. of Finance			X						X		Corporate fraud		X
Dyck, Volchkova, & Zingales	2008	J. of Finance			X						X		Governance violations		X
Engelberg & Parsons	2011	J. of Finance			X				X				Earnings announcements		X
Fang & Peress	2009	J. of Finance			X							X			X
Fang, Peress, & Zheng	2014	Rev. of Fin. Stud.			X	X						X			X
Farrell & Whidbee	2002	J. of B&F			X	X				X			CEO turnover		X
Gerstner, König, Ender, & Hambrick	2013	ASQ				X		X					Technological change		X
Gomulya & Boeker	2014	AMJ		X	X						X		Account restatement & CEO succession			X
Griffin, Hirschey, & Kelly	2011	Rev. of Fin. Stud.			X				X				Earnings announcements		X
Gurun & Butler	2012	J. of Finance			X							X			X	X
Hayward & Hambrick	1997	ASQ				X		X					M&A		X	X
Hillert, Jacobs, & Müller	2014	Rev. of Fin. Stud.			X	X						X			X	X
Hoffman & Ocasio	2001	Org. Science		X							X		Attention to environmental events		X
Horverak	2009	Mkt. Science			X	X		X					Product evaluation			X
Houston, Lin, & Ma	2011	J. of Fin. Econ.			X					X			Banking corruption
Huang	2015	Rev. of Fin. Stud.			X							X			X
Jensen & Roy	2008	AMJ		X		X					X				X
Joe	2003	J. of Acc. Res.			X	X					X		Loan default		X
Joe, Louis, & Robinson	2009	J. of Fin. & Qnt. A.		X	X					X			Board quality		X	X
Johnson, Ellstrand, Dalton, & Dalton	2005	Str. Mgmt. J			X					X			Board quality		X	X
Jonsson & Buhr	2011	Org. Science		X							X		Excessive pricing		X	X
Kalay	2015	Rev. of Acc. Stud.			X	X			X				Investor composition		X
Kang & Kim	2017	Org. Science		X	X					X			CEO pay		X	X	X
Kaniel & Parham	2017	J. of Fin. Econ.			X	X		X					Product evaluation			X
Kim, Zhang, Li, & Tian	2014	J. of B&F			X							X	Press freedom
King	2008	ASQ		X							X		Boycotts		X
King & Soule	2007	ASQ		X							X		Protest		X
Kjaergaard, Morsing, & Ravasi	2011	J. of M. Studies				X						X
Kolbel, Busch, & Jancso	2017	Str. Mgmt. J		X						X			CSR media coverage to financial risk		X	X
Kothari, Li, & Short	2009	The Acc. Rev.			X				X				Earnings announcements		X	X
Kuhnen & Niessen	2012	Mgmt. Science		X						X			CEO pay			X
Lamin & Zaheer	2012	Org. Science		X							X		Sweatshop labor			X
Liu & McConnell	2013	J. of Fin. Econ.			X						X		Shareholder resistance to M&A		X	X
Liu & Shankar	2015	Mgmt. Science			X						X		Product recalls		X
Liu, McConnell, & Xu	2017	J. of B&F			X					X			CEO opportunities after retirement		X	X
Liu, Sherman, & Zhang	2014	Mgmt. Science			X				X				IPO		X
Love, Lim, & Bednar	2017	AMJ		X		X		X					Reaction to CEO		X	X
McDonnell & King	2013	ASQ		X							X		Boycotts		X
Miller	2006	J. of Acc. Res.			X						X		Accounting violations		X
Nikolaeva & Bicho	2011	J. of. Ac. of. Mkt. Sc.		X						X			CSR activities		X
Park & Westphal	2013	ASQ				X				X			Attribution of firm performance to CEO		X	X
Peress	2014	J. of Finance			X							X			X
Petkova, Rindova, & Gupta	2013	Org. Science		X					X				VC investment		X
Pfarrerr, Pollock, & Rindova	2010	AMJ		X		X			X				Reactions to earning surprises		X	X
Piazza & Perretti	2015	Org. Science		X							X		Investment in stigmatized category		X	X
Pollock & Rindova	2003	AMJ		X		X			X				IPO		X	X
Pollock, Rindova, & Maggitti	2008	AMJ				X			X				IPO		X	X
Rhee & Valdez	2009	AMR		X		X					X		Reputation Repair		X	X
Rinallo & Basuroy	2009	J. of Marketing		X	X			X					Product evaluation		X
Rindova, Petkova, & Kotha	2007	Strategic Org.		X				X					New ventures		X	X	X
Robinson, Xue, & Yu	2011	The Acc. Rev.			X					X			CEO pay		X
Rogers, Skinner, & Zechman	2016	Rev. of Acc. Stud.			X				X				Trading by firm insiders		X
Shani & Westphal	2016	AMJ				X				X			CEO-journalist social relationship		X	X
Solomon	2012	J. of Finance			X	X			X				Use of IR firms		X	X
Solomon, Soltes, & Sosyura	2014	J. of Fin. Econ.				X		X					Product coverage		X
Stephen & Galak	2012	J. of Mkt. Res.			X			X					Product coverage		X
Tan	2016	Str. Mgmt. J			X			X					Patent litigation		X	X
Tang & Tang	2016	J. of Management		X							X		Environmental incident		X
Tetlock	2011	Rev. of Fin. Stud.			X	X						X			X		X
Tetlock	2007	J. of Finance			X	X			X				Financial news			X
Tetlock, Saar-Tsechansky, & Macskassy	2008	J. of Finance			X	X						X			X	X	X
van Heerde, Gijsbrechts, & Pauwels	2015	J. of Mkt. Res.		X	X			X					Price war		X	X
Vanacker & Forbes	2016	Org. Science		X	X							X			X
Vergne	2012	AMJ		X		X						X			X	X
Westphal & Deephouse	2011	Org. Science				X				X			Attribution of firm performance to CEO			X
Westphal, Park, McDonald, & Hayward	2012	ASQ				X				X			Attribution of firm performance to CEO		X	X
Wiersema & Zhang	2013	Str. Mgmt. J		X							X		Option backdating scandal		X
Zavyalova, Pfarrer, & Reger	2017	AMR				X						X
Zavyalova, Pfarrer, Reger, & Shapiro	2012	AMJ		X		X					X		Product recalls		X	X

## Sheet: Coding Table 2
ONLINE APPENDIX: CLASSIFICATION OF LITERATURE (2)
General information				Regional scope					Antecedents of coverage					Consequences of coverage
Authors	Year	Journal	x	U.S. only	Other single country	Multi-country	Meta study	x	Firm	Media	Environment	Detail	x	Firm	Firm leadership	Audience	Media	Detail
Ahern & Sosyura	2014	J. of Finance		X					X			Impression mgmt. (press releases)				X		Stock market response (stock price)
Ahern & Sosyura	2015	Rev. of Fin. Stud.		X					X	X		Firm char., media: individual (career stage)				X		Stock market response (stock price)
Ahluwalia, Burnkrant, & Unnava	2000	J. of Mkt. Res.		X												X		Customer beliefs (attitude towards firm)
Bansal & Clelland	2004	AMJ		X										X				Performance (unsystematic risk)
Barber & Odean	2008	Rev. of Fin. Stud.		X												X		Stock market response (trading behavior)
Bednar	2012	AMJ		X					X			Firm char., context char. (governance)		X	X			Firm response (governance & CEO pay)
Bednar, Boivie, & Prince	2013	Org. Science		X										X				Firm response (strategic change)
Bednar, Love, & Kraatz	2015	AMJ		X											X			Human capital (CEO reputation)
Berger, Sorensen, & Rasmussen	2010	Mkt. Science		X										X				Performance (sales)
Bitektine	2011	AMR														X		Social evaluation
Bowen, Call, & Rajgopal	2010	The Acc. Rev.		X										X		X		Firm (gov.), & Stock mkt. response (stock price)
Briscoe & Murphy	2012	ASQ		X					X		X	Context char., stakeholder activism				X		Competitor response (adoption)
Bushee & Miller	2012	The Acc. Rev.		X					X			Impression mgmt. (use of IR firm)
Bushee, Core, Guay, & Hamm	2010	J. of Acc. Res.		X					X		X	Firm char., impression mgmt., stock mkt. dynamics				X		Stock market response (market depth, spread)
Bushman, Williams, & Wittenberg-Moerman	2017	J. of Acc. Res.		X												X		Stock market response (investors, rate spread)
Cahan, Chen, Chen, & Nguyen	2015	J. of B&F		X					X			Context char. (CSR), impression mgmt. (PR)				X		Stock market response (cost of capital, Tobin's q)
Carter	2006	J. of M. Studies		X										X				Firm response (impression mgmt., advertising)
Chatterjee & Hambrick	2011	ASQ		X										X				Firm response (risk-taking)
Chen, Liu, & Zhang	2012	J. of Marketing		X												X		Stock market response (return)
Core, Guay, & Larker	2008	J. of Fin. Econ.		X					X			Context char. (CEO pay)		X	X			Firm response, human capital [non-finding]
Dai, Parwada, & Zhang	2015	J. of Acc. Res.		X					X			Firm char.			X			TMT response (insider trading)
Deephouse	2000	J. of Management		X										X				Performance (return on assets)
Deephouse & Carter	2005	J. of M. Studies		X					X			Firm performance
Desai	2011	AMJ		X										X				Firm response (impression management)
Desai	2014	J. of Management		X												X		Competitor response (investment in safety)
Dixon-Fowler, Ellstrand, & Johnson	2013	Str. Mgmt. J		X					X			Context char. (appointment of female CEO)
Dougal, Engelberg, Garcia, & Parsons	2012	Rev. of Fin. Stud.		X												X		Stock market response (market return)
Drake, Guest, & Twedt	2014	The Acc. Rev.		X												X		Stock market response (mispricing)
Drake, Roulstone, & Thornock	2012	J. of Acc. Res.		X												X		Stock market response (demand for information)
Durand & Vergne	2015	Str. Mgmt. J				X								X		X		Firm/competitor response (asset divestment)
Dyck, Morse, & Zingales	2010	J. of Finance		X													X	Journalists' human capital (career prospects)
Dyck, Volchkova, & Zingales	2008	J. of Finance				X			X			Firm char., context char. (violation type)		X				Firm response (correction of violation)
Engelberg & Parsons	2011	J. of Finance		X												X		Stock market response (trading)
Fang & Peress	2009	J. of Finance		X					X			Firm char.				X		Stock market response (return)
Fang, Peress, & Zheng	2014	Rev. of Fin. Stud.		X												X		Stock market response (trading)
Farrell & Whidbee	2002	J. of B&F		X										X	X			Firm response (CEO turnover), human capital
Gerstner, König, Ender, & Hambrick	2013	ASQ		X										X				Firm response (technology adoption)
Gomulya & Boeker	2014	AMJ		X					X			Context char. (restatement, successor char.)
Griffin, Hirschey, & Kelly	2011	Rev. of Fin. Stud.					X									X		Stock market response (return, volatility)
Gurun & Butler	2012	J. of Finance		X					X			Firm char., media advertising				X		Stock market response (return)
Hayward & Hambrick	1997	ASQ		X										X				Firm response (paid acquisition premia)
Hillert, Jacobs, & Müller	2014	Rev. of Fin. Stud.		X					X			Firm char.				X		Stock market response (return)
Hoffman & Ocasio	2001	Org. Science		X							X	Industy and outsiders' attention
Horverak	2009	Mkt. Science			X									X				Performance (sales)
Houston, Lin, & Ma	2011	J. of Fin. Econ.					X							X				Firm response (bank corruption)
Huang	2015	Rev. of Fin. Stud.		X												X		Stock market response (return)
Jensen & Roy	2008	AMJ		X										X				Firm choice of audit partner
Joe	2003	J. of Acc. Res.		X												X		Auditor beliefs (default likelihood)
Joe, Louis, & Robinson	2009	J. of Fin. & Qnt. A.		X										X		X		Firm (governance) & stock market (return) resp.
Johnson, Ellstrand, Dalton, & Dalton	2005	Str. Mgmt. J		X												X		Stock market response (stock price)
Jonsson & Buhr	2011	Org. Science			X									X				Performance (sales)
Kalay	2015	Rev. of Acc. Stud.		X												X		Stock market response (trading behavior)
Kang & Kim	2017	Org. Science		X											X			Human capital (CEO pay)
Kaniel & Parham	2017	J. of Fin. Econ.		X										X				Performance (sales), firm resp. (strategy, advert.)
Kim, Zhang, Li, & Tian	2014	J. of B&F					X									X		Stock market resp. (price synchronicity, FINC)
King	2008	ASQ		X										X				Firm response (concession to boycotters)
King & Soule	2007	ASQ		X												X		Stock market response (return)
Kjaergaard, Morsing, & Ravasi	2011	J. of M. Studies			X									X				Employee beliefs
Kolbel, Busch, & Jancso	2017	Str. Mgmt. J		X					X			CSR
Kothari, Li, & Short	2009	The Acc. Rev.		X												X		Stock market response (cost of capital, volatility)
Kuhnen & Niessen	2012	Mgmt. Science		X											X			Human capital (CEO pay)
Lamin & Zaheer	2012	Org. Science		X					X			Impression management (PR)
Liu & McConnell	2013	J. of Fin. Econ.		X										X				Firm response (abandonment of acquisition)
Liu & Shankar	2015	Mgmt. Science		X												X		Customer beliefs (brand preference)
Liu, McConnell, & Xu	2017	J. of B&F		X											X			Human capital (employment after retirement)
Liu, Sherman, & Zhang	2014	Mgmt. Science				X										X		Stock mtk. resp. (coverage, liquidity, stock price)
Love, Lim, & Bednar	2017	AMJ		X					X			Firm reputation
McDonnell & King	2013	ASQ		X										X				Firm response (impression management)
Miller	2006	J. of Acc. Res.		X					X			Firm & context char.				X		Stock market response (return)
Nikolaeva & Bicho	2011	J. of. Ac. of. Mkt. Sc.				X								X				Firm response (adoption of practice)
Park & Westphal	2013	ASQ		X							X	Impression mgmt. (by other CEOs)
Peress	2014	J. of Finance				X										X		Stock market response (return, volatility, volume)
Petkova, Rindova, & Gupta	2013	Org. Science		X					X			Firm char., impression management (PR)		X				Resource acquisition (VC funding)
Pfarrerr, Pollock, & Rindova	2010	AMJ		X					X			Firm celebrity		X		X		Firm & investor response
Piazza & Perretti	2015	Org. Science		X										X				Firm responce (divestment)
Pollock & Rindova	2003	AMJ		X												X		Stock market response (turnover, underpricing)
Pollock, Rindova, & Maggitti	2008	AMJ		X						X	X	Media routines, stock market dynamics (turnover)
Rhee & Valdez	2009	AMR														X		Reputation repair
Rinallo & Basuroy	2009	J. of Marketing				X			X	X		Firm char., media advertising, media routines
Rindova, Petkova, & Kotha	2007	Strategic Org.		X					X			Context char. (market actions)
Robinson, Xue, & Yu	2011	The Acc. Rev.		X										X	X			Firm resp. (disclosure), human capital (CEO pay)
Rogers, Skinner, & Zechman	2016	Rev. of Acc. Stud.		X												X		Stock market response (stock price, turnover)
Shani & Westphal	2016	AMJ		X					X	X		Impression mgmt. (CEO), individual (career stage)			X			CEO response (impression mgmt.)
Solomon	2012	J. of Finance		X					X			Impression mgmt. (IR, PR)				X		Stock market response (return)
Solomon, Soltes, & Sosyura	2014	J. of Fin. Econ.		X										X				Performance (sales)
Stephen & Galak	2012	J. of Mkt. Res.		X						X		Media routines (reliance on other media)		X				Performance (sales)
Tan	2016	Str. Mgmt. J		X										X				Firm response (patent litigation)
Tang & Tang	2016	J. of Management			X									X		X		Firm, government, & customer response
Tetlock	2011	Rev. of Fin. Stud.		X												X		Stock market response (return, turnover)
Tetlock	2007	J. of Finance		X							X	Stock market dynamics (return)				X		Stock market response (return, turnover)
Tetlock, Saar-Tsechansky, & Macskassy	2008	J. of Finance		X												X		Stock market response (return)
van Heerde, Gijsbrechts, & Pauwels	2015	J. of Mkt. Res.			X				X			Context char. (pricing), media advertising		X		X		Performance (sales), stock market resp. (return)
Vanacker & Forbes	2016	Org. Science			X									X				Resource acquisition (personnel)
Vergne	2012	AMJ				X			X			Stigmatized category
Westphal & Deephouse	2011	Org. Science		X					X			Impression mgmt. (CEO)			X			CEO response (retaliation)
Westphal, Park, McDonald, & Hayward	2012	ASQ		X					X			Impression mgmt. (by other CEOs)
Wiersema & Zhang	2013	Str. Mgmt. J		X										X				Firm response (CEO turnover)
Zavyalova, Pfarrer, & Reger	2017	AMR							X	X	X	Firm celebrity
Zavyalova, Pfarrer, Reger, & Shapiro	2012	AMJ		X					X			Context char., impression mgmt. (PR)
